# Supplementary material for: Leuconostoc pseudomesenteroides improves microbiota dysbiosis and liver metabolism imbalance and ameliorates the correlation between dihydroceramide and strains of Firmicutes and Proteobacteria in high fat diet obese mice
Source: Royal Society of Chemistry journal article supplement (doi:10.1039/d0fo01009j), 2020-01-01
Supplement: d0fo01009j1.pdf [file d0fo01009j1.pdf]

### Supplemental Table 1

**Table S1.** Composition of diets fed to mice

| Ingredient         | MD10% Fat | MD 60% Fat |
|--------------------|-----------|------------|
| Casein             | 18.96     | 25.85      |
| L-cystein          | 0.28      | 0.39       |
| Corn starch        | 29.86     | 0          |
| Maltodextrin       | 3.32      | 16.15      |
| Sucrose            | 33.17     | 8.89       |
| Cellulose          | 4.74      | 6.46       |
| Soybean oil        | 2.37      | 3.23       |
| Lard               | 1.9       | 31.66      |
| Mineral Mix        | 4.24      | 5.79       |
| Choline bitartrate | 1.14      | 1.55       |
| Total              | 99.98     | 99.97      |
| Energy Composition | 100       | 100        |
| Protein            | 20        | 20         |
| Carbohydrate       | 70        | 20         |
| Fat                | 10        | 60         |

## Supplemental Table 2

Table S2 The information and changing trend of potential biomarkers in Tu group and

HFD group

| ID       | Metabolite                                                  | Formula     | Retention time (min) | Tu vs HFD |
|----------|-------------------------------------------------------------|-------------|----------------------|-----------|
| pos_6339 | Cys Gly Ala Asp                                             | C12H20N4O7S | 0.616683             | ↓         |
| pos_98   | 13Z-Docosenamide                                            | C22H43NO    | 9.7878               | ↑         |
| pos_4930 | C16 Sphinganine                                             | C16H35NO2   | 5.876367             | ↑         |
| pos_288  | myo-Inositol                                                | C6H12O6     | 0.616683             | ↓         |
| pos_36   | Salicylaldehyde                                             | C7H6O2      | 0.888167             | ↓         |
| pos_656  | PI(20:4(5Z,8Z,11Z,14Z)/0:0)                                 | C29H49O12P  | 7.4536               | ↓         |
| pos_2741 | LysoPC(20:0)                                                | C28H58NO7P  | 9.316                | ↓         |
| pos_3257 | 2-(1-Aziridinyl)ethanol                                     | C4H9NO      | 14.07322             | ↑         |
| pos_728  | LysoPE(22:0/0:0)                                            | C27H56NO7P  | 9.060017             | ↓         |
| pos_6300 | Vaccinoside                                                 | C25H28O13   | 0.7075               | ↓         |
| pos_3318 | 2,2,4,4,6,6-Hexamethyl-1,3,5-trithiane                      | C9H18S3     | 14.76695             | ↓         |
| pos_6294 | Glycerophosphocholine                                       | C8H20NO6P   | 0.718                | ↓         |
| pos_4521 | 25-Acetylvulgaroside                                        | C27H42O7    | 7.760083             | ↓         |
| pos_4934 | Dihydroceramide                                             | C19H39NO3   | 5.856367             | ↑         |
| pos_947  | Sporidesmolide I                                            | C33H58N4O8  | 12.91712             | ↑         |
| pos_1015 | 24S-OH-7-DHC                                                | C27H44O2    | 9.2385               | ↑         |
| pos_3168 | DG(18:2n6/0:0/22:6n3)                                       | C44H70O5    | 13.15877             | ↑         |
| pos_2753 | 3-Hydroxy-10'-apo-b,y-carotenal                             | C27H36O2    | 9.376667             | ↓         |
| pos_4451 | Leu Ser Pro Lys Lys                                         | C26H49N7O7  | 8.1324               | ↓         |
| pos_706  | Palmitoyl Ethanolamide                                      | C18H37NO2   | 8.6107               | ↑         |
| pos_4638 | Stearyl citrate                                             | C24H44O7    | 7.181283             | ↑         |
| pos_3652 | 1-O-beta-D-Glucopyranosyl-2,3-di-O-(8-hexadecenoyl)glycerol | C41H74O10   | 12.32532             | ↑         |
| pos_4965 | Lys Ala Trp Trp                                             | C31H39N7O5  | 5.63755              | ↓         |
| pos_467  | Lumichrome                                                  | C12H10N4O2  | 3.286017             | ↑         |
| pos_251  | 2,4-Dihydroxy-2,5-dimethyl-3(2H)-furanone                   | C6H8O4      | 0.2616               | ↓         |

|          |                             |             |          |   |
|----------|-----------------------------|-------------|----------|---|
| pos_4088 | Ile Arg Leu                 | C18H36N6O4  | 9.8443   | ↑ |
| pos_4477 | Docosaehaenoyl Ethanolamide | C24H37NO2   | 8.0084   | ↓ |
| pos_1013 | D-erythro-Sphingosine C-20  | C20H41NO2   | 9.2385   | ↑ |
| pos_675  | Arg Cys Lys Gln             | C20H39N9O6S | 7.93825  | ↑ |
| pos_3917 | PE(15:0/16:1(9Z))           | C36H70NO8P  | 10.9334  | ↑ |
| pos_3529 | Pisumoside B                | C32H52O16   | 13.3442  | ↓ |
| pos_967  | Hericenone E                | C37H54O6    | 11.69652 | ↑ |

---

### Supplemental Table 3

Table S3 Correlation between metabolics and otu\_table in phylum levels

| Metabolite                           | <i>Firmicutes</i> | <i>Bacteroidetes</i> | <i>Actinobacteria</i> | <i>Proteobacteria</i> |
|--------------------------------------|-------------------|----------------------|-----------------------|-----------------------|
| Glutathione                          | -0.7714           | 0.4286               | -0.0857               | 0.6571                |
| Cys Gly Ala Asp                      | -0.8286           | 0.2571               | -0.1429               | 0.2571                |
| Leu Ser Pro Lys Lys                  | -0.8286           | 0.2571               | -0.1429               | 0.2571                |
| Tazobactam                           | -0.4286           | -0.1429              | -0.4286               | 0.8857                |
| 25-Acetylvulgaroside                 | -0.1429           | -0.4286              | -0.8286               | 0.2571                |
| 3-Hydroxy-10'-apo-b,y-carotenal      | -0.0857           | -0.3143              | -0.7714               | 0.3714                |
| LysoPE(22:0/0:0)                     | -0.7143           | 0.0857               | -0.3714               | 0.4857                |
| LysoPE<br>(0:0/20:4(8Z,11Z,14Z,17Z)) | -0.3143           | 0.7714               | 0.7143                | 0.3714                |
| C16 Sphinganine                      | -0.7143           | -0.3714              | 0.0286                | -0.8286               |
| Dihydroceramide                      | -0.7714           | -0.2571              | 0.0857                | 0.7143                |
| Arg Cys Lys Gln                      | 0.8286            | -0.2571              | -0.2                  | -0.0857               |
| 2-(1-Aziridinyl)ethanol              | 0.7714            | -0.1429              | 0.0857                | -0.1429               |
| Stearyl citrate                      | 0.8286            | -0.2571              | 0.1429                | -0.2571               |
| 24S-OH-7-DHC                         | 0.0857            | 0.5429               | 0.7714                | -0.1429               |

**Supplemental Table 4**

Table S4 Correlation between metabolics and otu\_table in genus levels

| Metabolite                    | <i>Desulfovibrio</i> | <i>Erysipelatoclostridium</i> | <i>unidentified_<br/>Ruminococcaceae</i> | <i>Oscillibacter</i> | <i>Faecalibaculum</i> | <i>Bacteroides</i> |
|-------------------------------|----------------------|-------------------------------|------------------------------------------|----------------------|-----------------------|--------------------|
| C16 Sphinganine               | 0.3143               | -0.5429                       | -0.6                                     | -0.7143              | 0.3143                | -0.3714            |
| Ethyl glucuronide             | -0.7143              | 0.4857                        | -0.2571                                  | 0.3143               | -0.7143               | 0.1429             |
| PS(20:3(8Z,11Z,14Z)/18:1(9Z)) | 0.0857               | -0.2571                       | 0.3714                                   | -0.0857              | 0.8286                | 0.2571             |
| SM(d18:1/20:0)                | 0.1429               | -0.4286                       | 0.3143                                   | -0.1429              | 0.7714                | 0.0286             |
| stearoyl sphingomyelin        | 0.1429               | -0.4286                       | 0.3143                                   | -0.1429              | 0.7714                | 0.0286             |
| Ile Arg Leu<br>LysoPE         | 0.1429               | -0.4286                       | 0.3143                                   | -0.1429              | 0.7714                | 0.0286             |
| (0:0/20:4(8Z,11Z,14Z,17Z))    | -0.4286              | 0.4286                        | 0.4857                                   | 0.6                  | 0.2571                | 0.7714             |
| Vaccinoside                   | -0.6                 | 0.8286                        | -0.0857                                  | 0.7143               | -0.8286               | 0.5429             |
| Tazobactam                    | 0.2                  | 0.0286                        | 0.7143                                   | 0.3714               | -0.0286               | -0.1429            |
